# Supplementary material for: Reduced cell size, chromosomal aberration and altered proliferation rates are characteristics and confounding factors in the STHdh cell model of Huntington disease
Source: PubMed Central journal article supplement (PMC5715050; doi:10.1038/s41598-017-17275-4), 2017-12-04
Supplement: 41598_2017_17275_MOESM1_ESM.pdf [file 41598_2017_17275_MOESM1_ESM.pdf]

# Supplementary Figures

## **Reduced cell size, chromosomal aberration and altered proliferation rates are characteristics and confounding factors in the STHdh cell model of Huntington disease**

Elisabeth Singer<sup>1,2,#</sup>, Carolin Walter<sup>1,2,#</sup>, Jonasz J. Weber<sup>1,2,#</sup>, Ann-Christin Krahl<sup>3</sup>, Ulrike A. Mau-Holzmann<sup>1</sup>, Nadine Rischert<sup>1,2</sup>, Olaf Riess<sup>1,2</sup>, Laura E. Clemensson<sup>1,2,#</sup> and Huu P. Nguyen<sup>1,2,#,\*</sup>

1 Institute of Medical Genetics and Applied Genomics, University of Tuebingen, 72076 Tuebingen, Germany

2 Centre for Rare Diseases, University of Tuebingen, 72076 Tuebingen, Germany

3 Paediatric Hematology and Oncology, University Children's Hospital Tuebingen, 72076 Tuebingen, Germany.

# These authors contributed equally

\* Corresponding author: Dr. Huu Phuc Nguyen, Institute of Medical Genetics and Applied Genomics, Centre for Rare Diseases, University of Tuebingen, Calwerstrasse 7, Tuebingen, Germany, Phone: +49 7071 29 83210, Fax: +49 7071 29 5228, Email: [hoa.nguyen@med.uni-tuebingen.de](mailto:hoa.nguyen@med.uni-tuebingen.de)

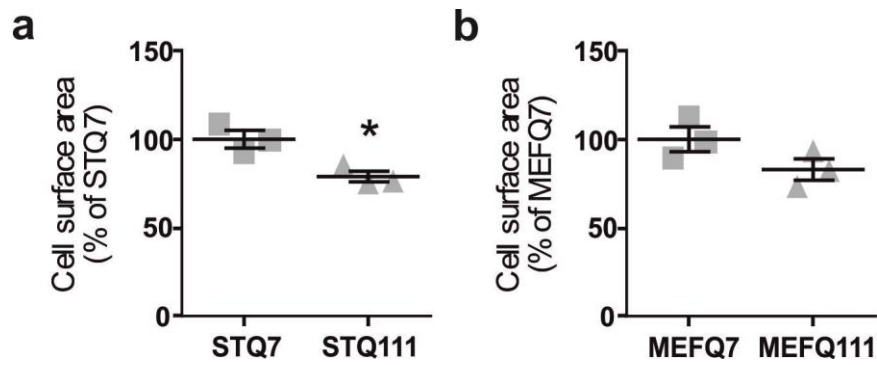

**Supplementary Figure S1: Cell size differences of detached cells can be manually determined in *STHdh* cells**

**(a)** ImageJ-based cell surface area quantification of *STHdh*<sup>Q7/Q7</sup> (STQ7) and *STHdh*<sup>Q111/Q111</sup>

(STQ111) cells, detached from the culture dish by gentle trypzination, taken from cell suspension loaded to a Neubauer chamber; n = 3 experiments, each with 3 replicates per

cell line, unpaired *t*-tests; \* *P* < 0.05 **(b)** ImageJ-based cell surface area quantification of

detached *MEFHdh*<sup>Q7/Q7</sup> (MEFQ7) and *MEFHdh*<sup>Q111/Q111</sup> (MEFQ111) cells; n = 3 experiments,

unpaired *t*-test.

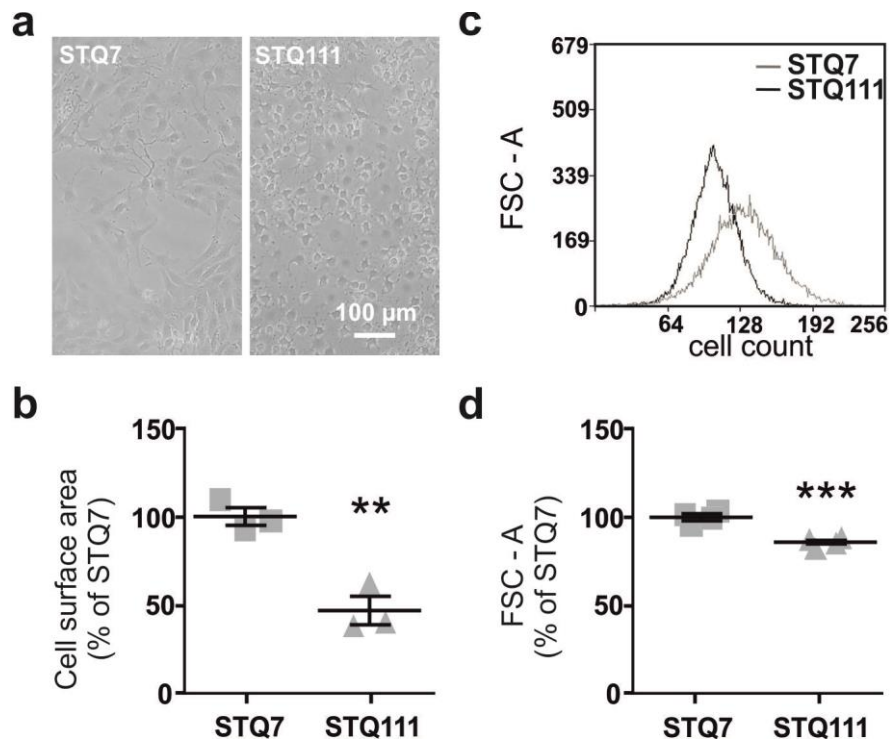

**Supplementary Figure S2: Neuron-like, differentiated *STHdh* cells show the same cell size phenotype**

**(a)** Representative picture of live, differentiated *STHdh*<sup>Q7/Q7</sup> (STQ7) and *STHdh*<sup>Q111/Q111</sup> (STQ111) cells and **(b)** ImageJ-based cell surface area quantification of the somata of cells, attached to the culture dish after 48 hours of differentiation; n=3 experiments, unpaired *t*-tests; \*\*  $P < 0.01$  **(c)** Representative histograms of *STHdh* cells with corresponding **(d)** quantification of the cell size of live cells in suspension, based on the relative mean forward scatter area (FSC-A); n = 4 experiments, unpaired *t*-tests; \*\*\*  $P < 0.001$ .

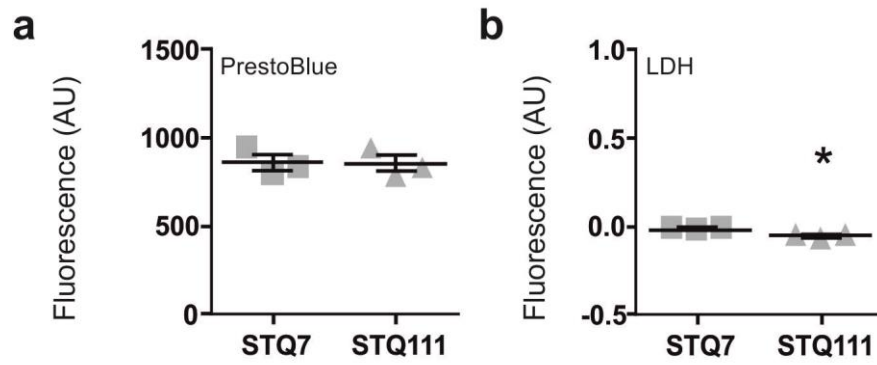

**Supplementary Figure S3: Differentiation into neuron-like cells results in comparable results between *STHdh* and *MEFHdh* cells**

Results from the cell size- and cell number-dependent tests for 24 hours differentiated *STHdh* cells: **(a)** PrestoBlue®, n = 3 experiments and **(b)** LDH assay, n = 3 experiments. Unpaired *t*-tests; \* *P* < 0.05.

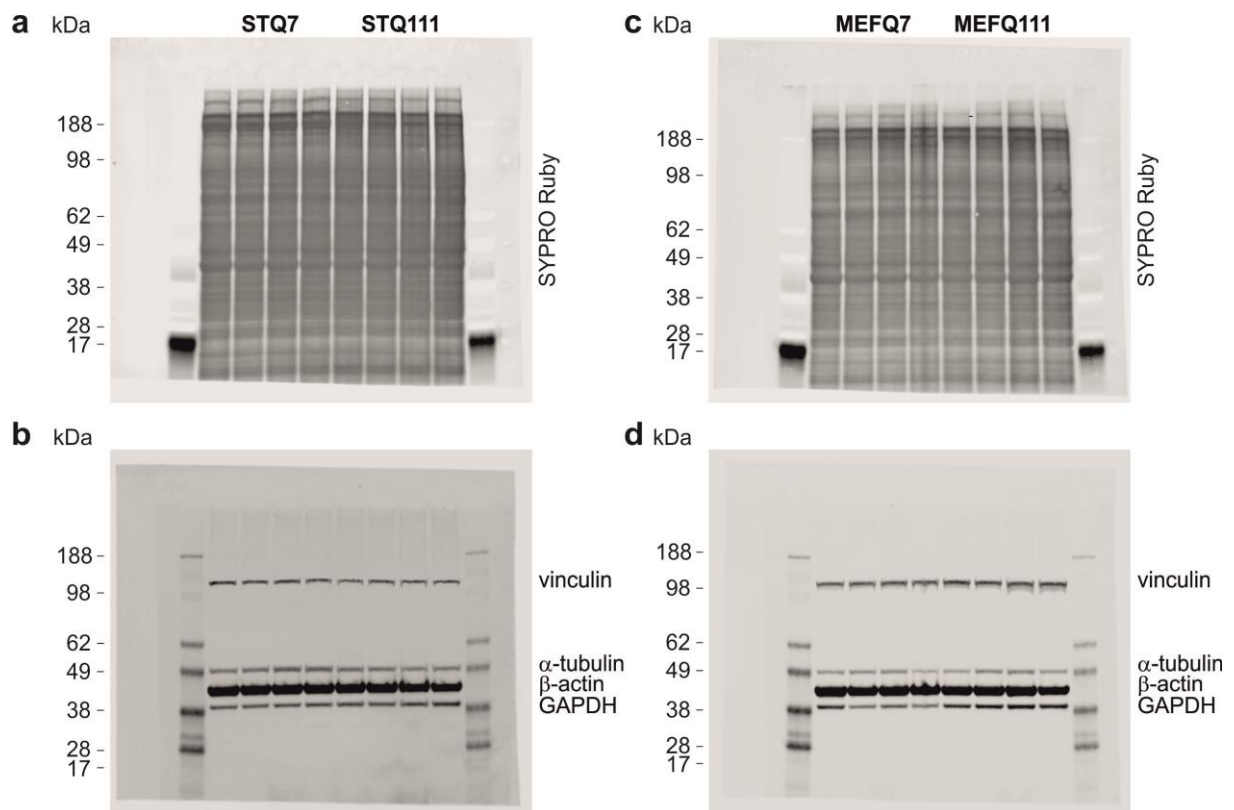

**Supplementary Figure S4: Chromosomal abnormalities impede the interpretation of western blot results in *STHdh* cells**

Full-length blots of (a) SYPRO Ruby staining and (b) analysed proteins from *STHdh* cell lysates (c and d) respective results from *MEFHdh* cell lysates.
